# Supplementary material
Source: PubMed Central journal article supplement (PMC4902601)
Supplement: supp_pp.16.00173_PP2016-00173R1_Supplemental_Materialfig1.pdf [file supp_pp.16.00173_PP2016-00173R1_Supplemental_Materialfig1.pdf]

**Supplemental  
Figure 1**

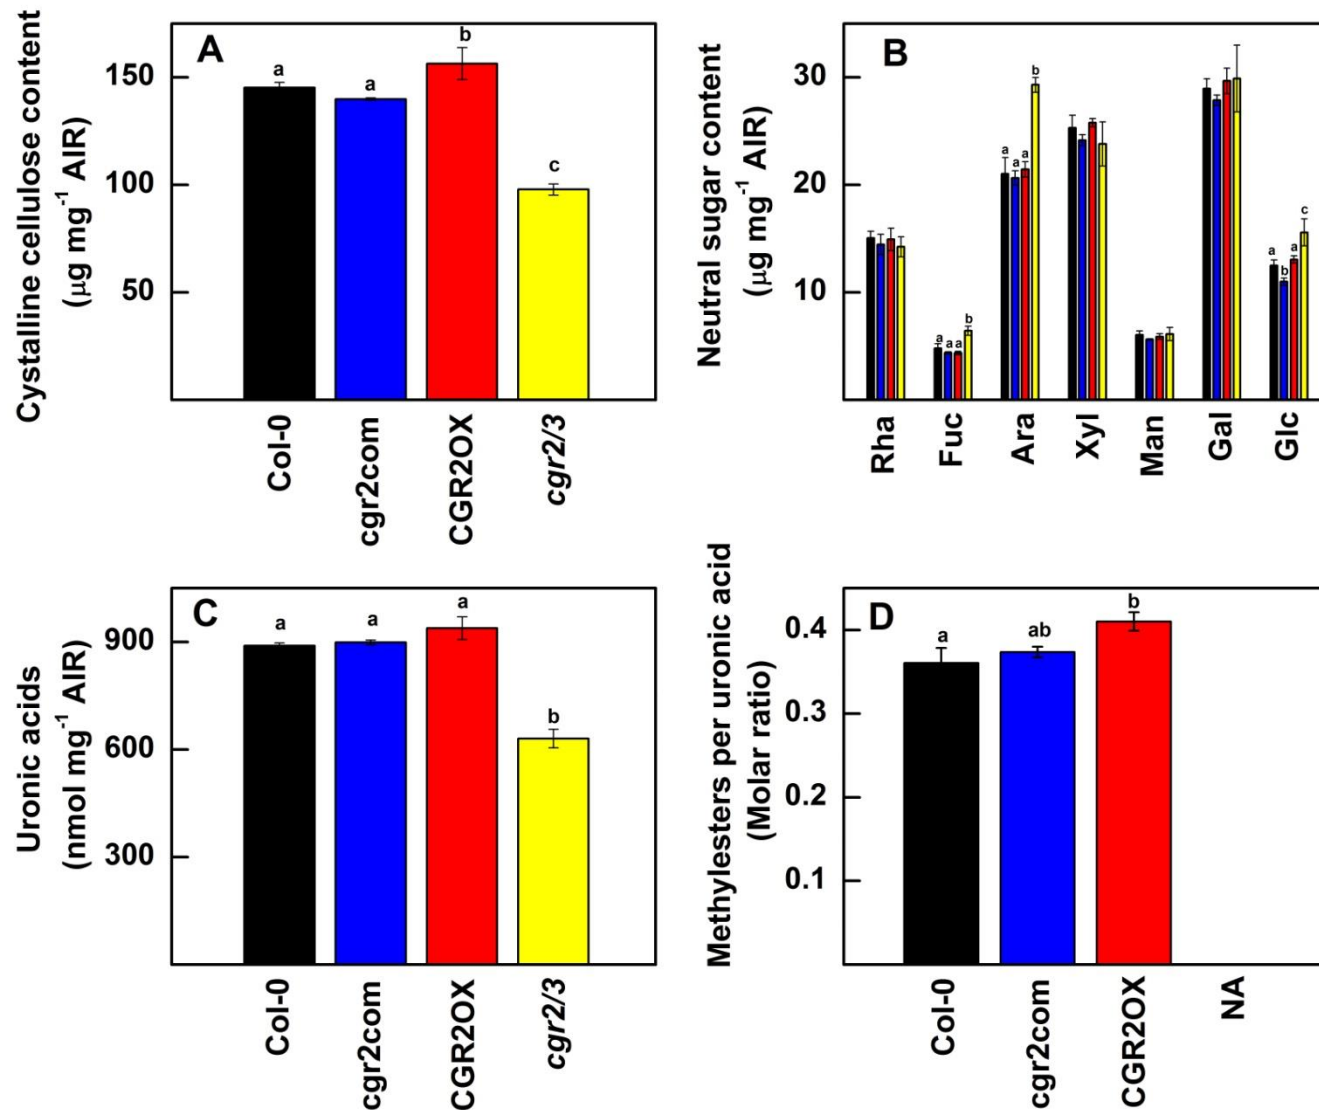

**Supplemental Figure S1. Cell wall composition in *Arabidopsis* with altered *CGR2* and *CGR3* expression.** (A) crystalline cellulose, (B) neutral sugar content, (C) uronic acid (pectin) content, and (D) the degree of methylesterification in leaves at 63 DAS is shown for Col-0, cgr2com, CGR2OX, and cgr2/3. In (A), (B) and (C), cell wall components are expressed in nmol or  $\mu\text{g}$  per mg of alcohol insoluble residue (AIR) of leaf tissue. In (D), cgr2/3 was not analysed due to insufficient leaf material (NA). Abbreviations of soluble sugars stands for: Rha - rhamnose, Fuc - Fucose, Ara - arabinose, Xyl - xylose, Man - mannose, Gal - galactose, Glc - glucose. Values represent the mean  $\pm$  SE and n = 2-3 plants per line. Statistical differences at  $\alpha = 0.05$  are marked with lower case letters.
