# Supplementary material
Source: PubMed Central journal article supplement (PMC4902601)
Supplement: supp_pp.16.00173_PP2016-00173R1_Supplemental_Materialfig2.pdf [file supp_pp.16.00173_PP2016-00173R1_Supplemental_Materialfig2.pdf]

Supplemental  
Figure 2

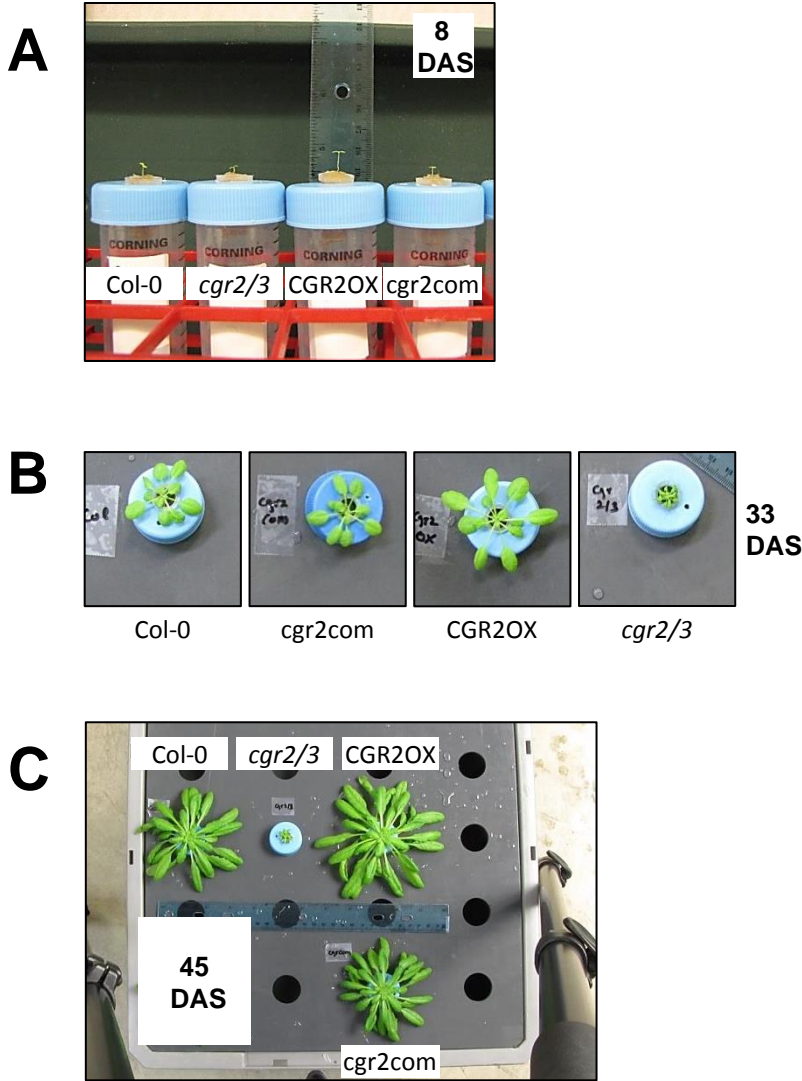

**Supplemental Figure S2. Hypocotyl and rosette size in *Arabidopsis* with altered *CGR2* and *CGR3* expression.** (A) Photographs comparing the height of the hypocotyls in 8-day old seedlings, and comparisons of rosette sizes in (B) 33-day and (C) 45-day old plants are presented for Col-0, cgr2com, CGR2OX, and cgr2/3.
