# Supplementary material
Source: PubMed Central journal article supplement (PMC4902601)
Supplement: supp_pp.16.00173_PP2016-00173R1_Supplemental_Materialfig3.pdf [file supp_pp.16.00173_PP2016-00173R1_Supplemental_Materialfig3.pdf]

**Supplemental  
Figure 3**

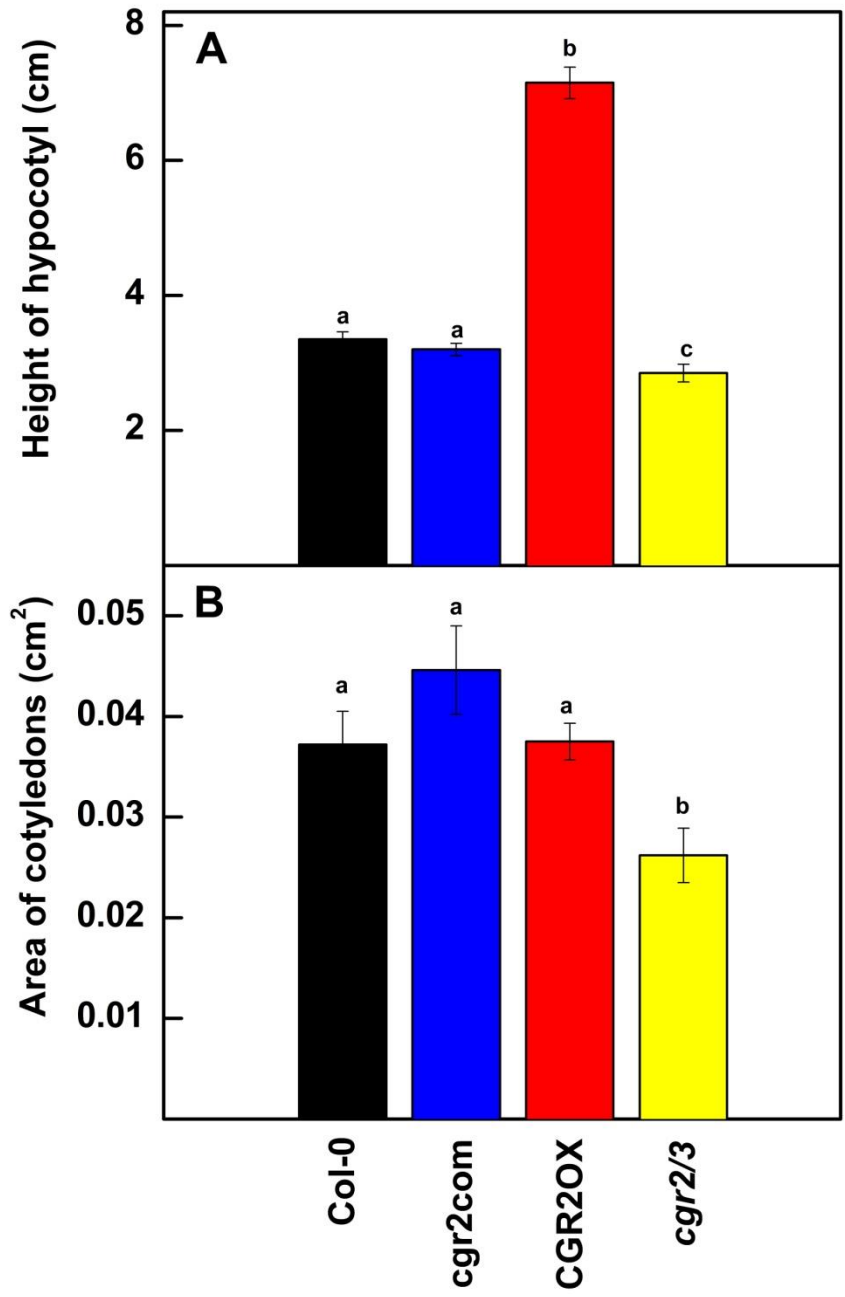

**Supplemental Figure S3. Early growth phenotypes in *Arabidopsis* with altered *CGR2* and *CGR3* expression.** (A) Height of hypocotyls in 8-day old seedlings, and (B) surface area of the cotyledons in 6-day old seedlings is presented for Col-0, cgr2com, CGR2OX, and cgr2/3. Values represent the mean  $\pm$  SE. For (A), n = 20 plants per line. For (B), n = 10 plants per line. Statistical differences at  $\alpha = 0.05$  are marked with lower case letters.
