# Supplementary material
Source: PubMed Central journal article supplement (PMC4902601)
Supplement: supp_pp.16.00173_PP2016-00173R1_Supplemental_Materialfig4.pdf [file supp_pp.16.00173_PP2016-00173R1_Supplemental_Materialfig4.pdf]

Supplemental Figure 4

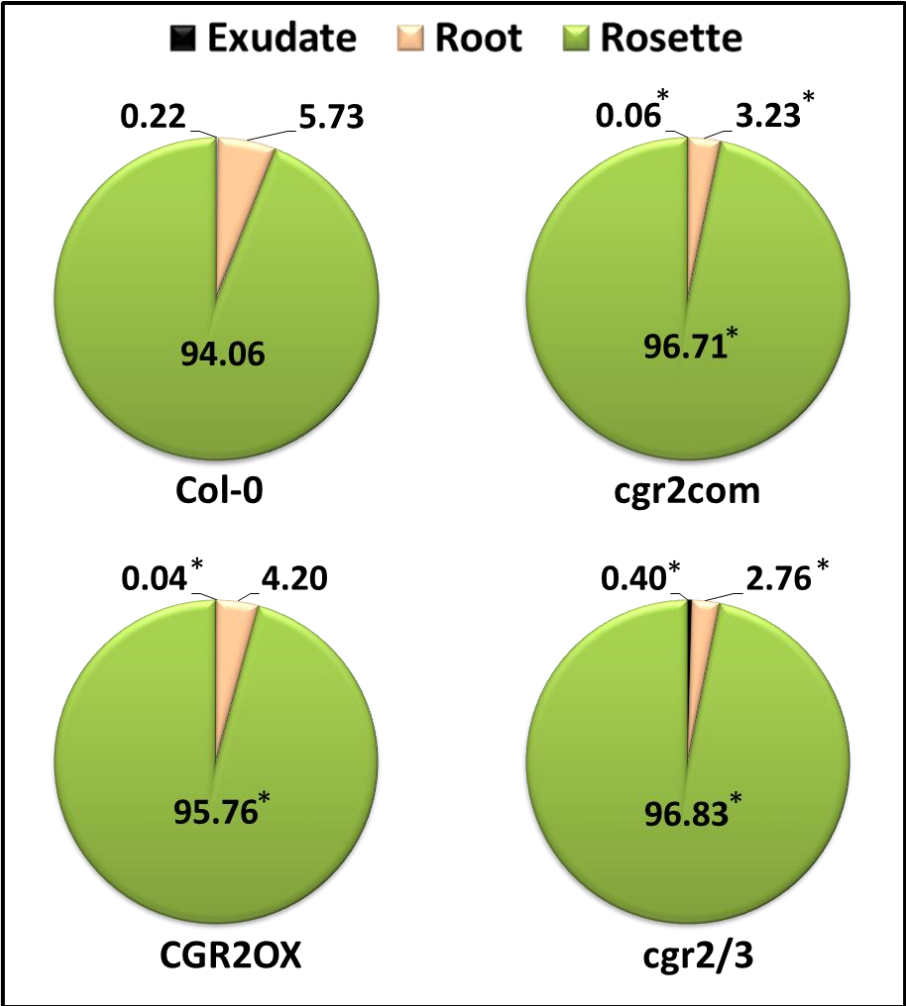

**Supplemental Figure S4. Partitioning of photosynthetic C to shoots and roots in *Arabidopsis* with altered *CGR2* and *CGR3* expression.** The amount of C present in the rosette and the root system as a percentage of total assimilated C is shown for Col-0, *cgr2com*, *CGR2OX*, and *cgr2/3*. 29-day old rosettes were fed  $^{14}\text{CO}_2$  and the proportions of C were found by determining the proportions of radioactivity in disintegrations per minute (DPM) in each tissue. Values represent the means of 4 biological replicates per line. Statistically significant differences from Col-0 at  $\alpha = 0.05$  when comparing C partitioning to rosettes, roots and exudation are marked with an asterisk (\*).
